# Supplementary material for: Lack of the Histone Deacetylase SIRT1 Leads to Protection against Endoplasmic Reticulum Stress through the Upregulation of Heat Shock Proteins
Source: MDPI journal article supplement (doi:10.3390/ijms25052856), 2024-03-01
Supplement: s1 [file s1]

## **SUPPLEMENTAL DATA**

### **Lack of the Histone Deacetylase SIRT1 leads to Protection against Endoplasmic Reticulum Stress through the Upregulation of Heat Shock Proteins**

Jessica Latorre<sup>1</sup>, Nuria de Vera<sup>1</sup>, Tomàs Santalucía<sup>2</sup>, Rafel Balada<sup>1</sup>, Anna Marazuela-Duque<sup>3</sup>, Alejandro Vaquero<sup>3</sup>, Anna M. Planas<sup>1,4</sup>, Valérie Petegnief<sup>1,4\*</sup>.

Material included: 2 figures and a table.

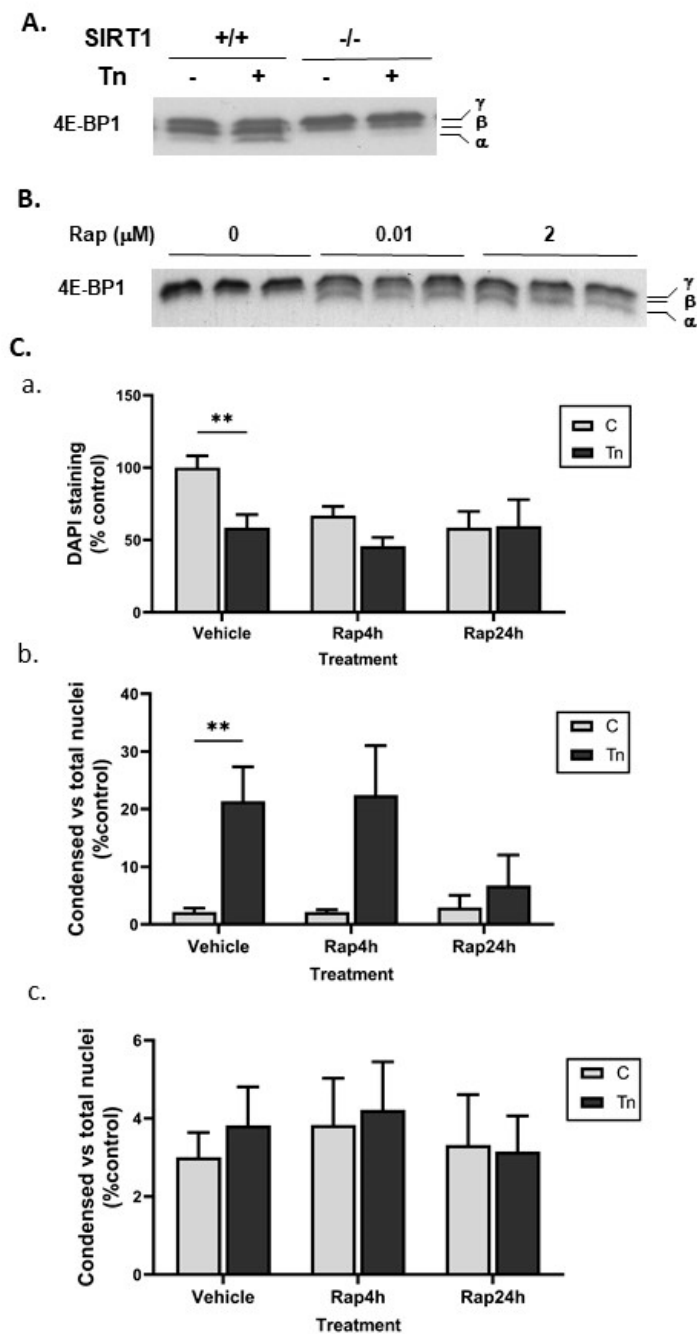

**Figure S1. mTOR was overactivated in SIRT1-deficient cells and was not responsible for increased resistance to ER stress.**

A. Western blot of 4E-BP1 in control and tunicamycin-treated cells showing the different phosphorylated forms of 4E-BP1 in SIRT1 KO cells and SIRT1 wt cells. Note the absence of the  $\alpha$  band: the less phosphorylated band of 4E-BP1 and the high level of the hyperphosphorylated  $\gamma$  band in KO cells. B.

Western blot of 4E-BP1 at 24h after the treatment of SIRT1<sup>-/-</sup> cells with rapamycin (Rap). C. Cells were treated for 4 or 24h with rapamycin 2  $\mu$ M and exposed to tunicamycin. Nuclei stained with DAPI were counted and expressed as % of respective control. DAPI staining showed that treatment with 2  $\mu$ M Rap for 4h partly reduced tunicamycin toxicity and at 24h, Rap abolished tunicamycin toxicity (FigS1Ca, n=3). DAPI staining of healthy and condensed nuclei (FigS1Cb, n=3) and lactate dehydrogenase activity in culture medium (FigS1Cc, n=3) were measured 24h after the tunicamycin addition. Results are mean  $\pm$  SEM, \*\*P<0.01.

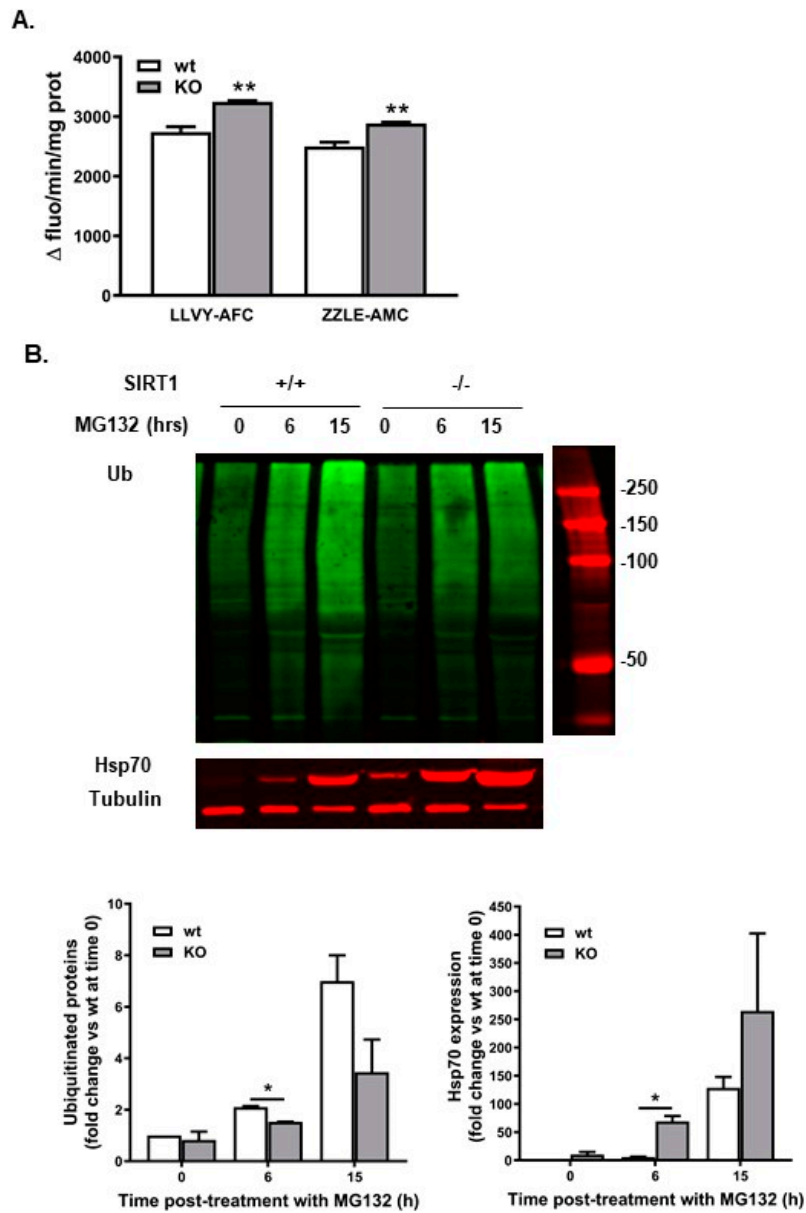

**Figure S2. Proteasome activity was higher in SIRT1 KO cells and the proteasome blockade differently affected the accumulation of ubiquitinated proteins and induction of Hsp70 in SIRT1 $+/+$  and SIRT1 $-/-$  cells**

A. Chymotrypsine and peptidyl-glutamyl-peptidase enzymatic activity were monitored by the cleavage of LLVY-AFC and ZLLE-AMC fluorescent peptides respectively in control wt and SIRT1 KO cells. Results are expressed as mean  $\pm$  SEM (n=3), \*\*P<0.01. B. Western blot showing the expression of

ubiquitinated proteins and Hsp70 after addition of MG132. Ubiquitination of high molecular weight proteins (75-250 kDa) was quantified (left graph). Results are expressed as mean  $\pm$  SEM, n=2, \*P<0.05.

**Table S1. RT-PCR, ChIP primers and shRNA sequences.**

| <b>RT-PCR primers</b>                                                                                 | <b>Location</b>                       | <b>Forward sequence (5'-3')</b>                                                             | <b>Reverse sequence (5'-3')</b>                                       |
|-------------------------------------------------------------------------------------------------------|---------------------------------------|---------------------------------------------------------------------------------------------|-----------------------------------------------------------------------|
| <b>Hsp70</b><br><b>L14</b><br><b>Socs-3</b>                                                           |                                       | GGCTGATCGGCCGCAAGTT<br>GGCTTTAGTGGATGGACCCT<br>GCGAGAAGATTCCGCTGGTA                         | GGAAGGGCCAGTGCTTCAT<br>ATTGATATCCGCCTTCTCCC<br>CGTTGACAGTCTTCCGACAAAG |
| <b>ChIP primers</b>                                                                                   |                                       |                                                                                             |                                                                       |
| <b>Hsp70 promoter<sup>(1)</sup></b><br><b>Socs3 promoter<sup>(2)</sup></b><br><b>Negative control</b> | +7/-143<br>-1247/-1039<br>-1164/-1001 | AGGGAGGCGGGGAAGCTCC<br>CCCCCACTTCTCATTCA<br>AGAAGAAATGGGGCTGGACG                            | GTCTGGTGACCTGCTCGCCG<br>TACATGAGGACCTCGGAGTG<br>TCCGGAGTGCTGGAATCCTA  |
| <b>shRNA</b>                                                                                          |                                       | <b>Sequence (5'-3')</b>                                                                     |                                                                       |
| <b>155</b><br><b>156</b><br><b>160</b><br><b>NS</b>                                                   |                                       | TGTGCTTCCTCTTGAAGTC<br>TAGAGATGACCATCTCCAG<br>AACCTACTTAGATTAAATG<br>ATCTCGCTTGGGCGAGAGTAAG |                                                                       |

**References:**

1. Sasi BK, Sonawane PJ, Gupta V, Sahu BS, Mahapatra NR. Coordinated transcriptional regulation of Hsp70 gene by multiple transcription factors: crucial roles for HSF-1, NF- $\kappa$ B, and CREB. J Mol Biol. 2014;426(1):116–35.
2. Hutchins AP, Diez D, Takahashi Y, Ahmad S, Jauch R, Tremblay ML, et al. Distinct transcriptional regulatory modules underlie STAT3's cell type-independent and cell type-specific functions. Nucleic Acids Res. 2013;41(4):2155–70.
